# Supplementary material for: HMGA1 pseudogenes as candidate proto-oncogenic competitive endogenous RNAs
Source: PubMed Central journal article supplement (PMC4226687; doi:10.18632/oncotarget.2202), 2014-07-15
Supplement: oncotarget-05-8341-s001.pdf [file oncotarget-05-8341-s001.pdf]

## SUPPLEMENTARY FIGURE

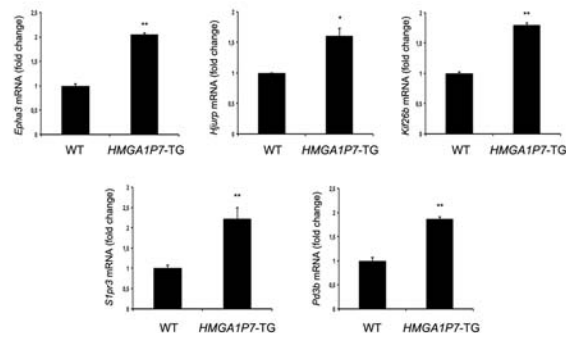

**Supplementary Figure S1: Genes modulated by *HMGA1P7* expression.** qRT-PCR validation of the Affymetrix GeneChip arrays hybridized with RNAs from WT and *HMGA1P7* overexpressing MEFs. The results are reported as the mean of values with error bars indicating SD (mean  $\pm$  SD); n=3. \*, P < 0.05 \*\* , P < 0.01 (t test).
